# Supplementary material for: Genome-wide variations in a natural isolate of the nematode Caenorhabditis elegans
Source: PubMed Central journal article supplement (PMC4023591; doi:10.1186/1471-2164-15-255), 2014-04-02

a)

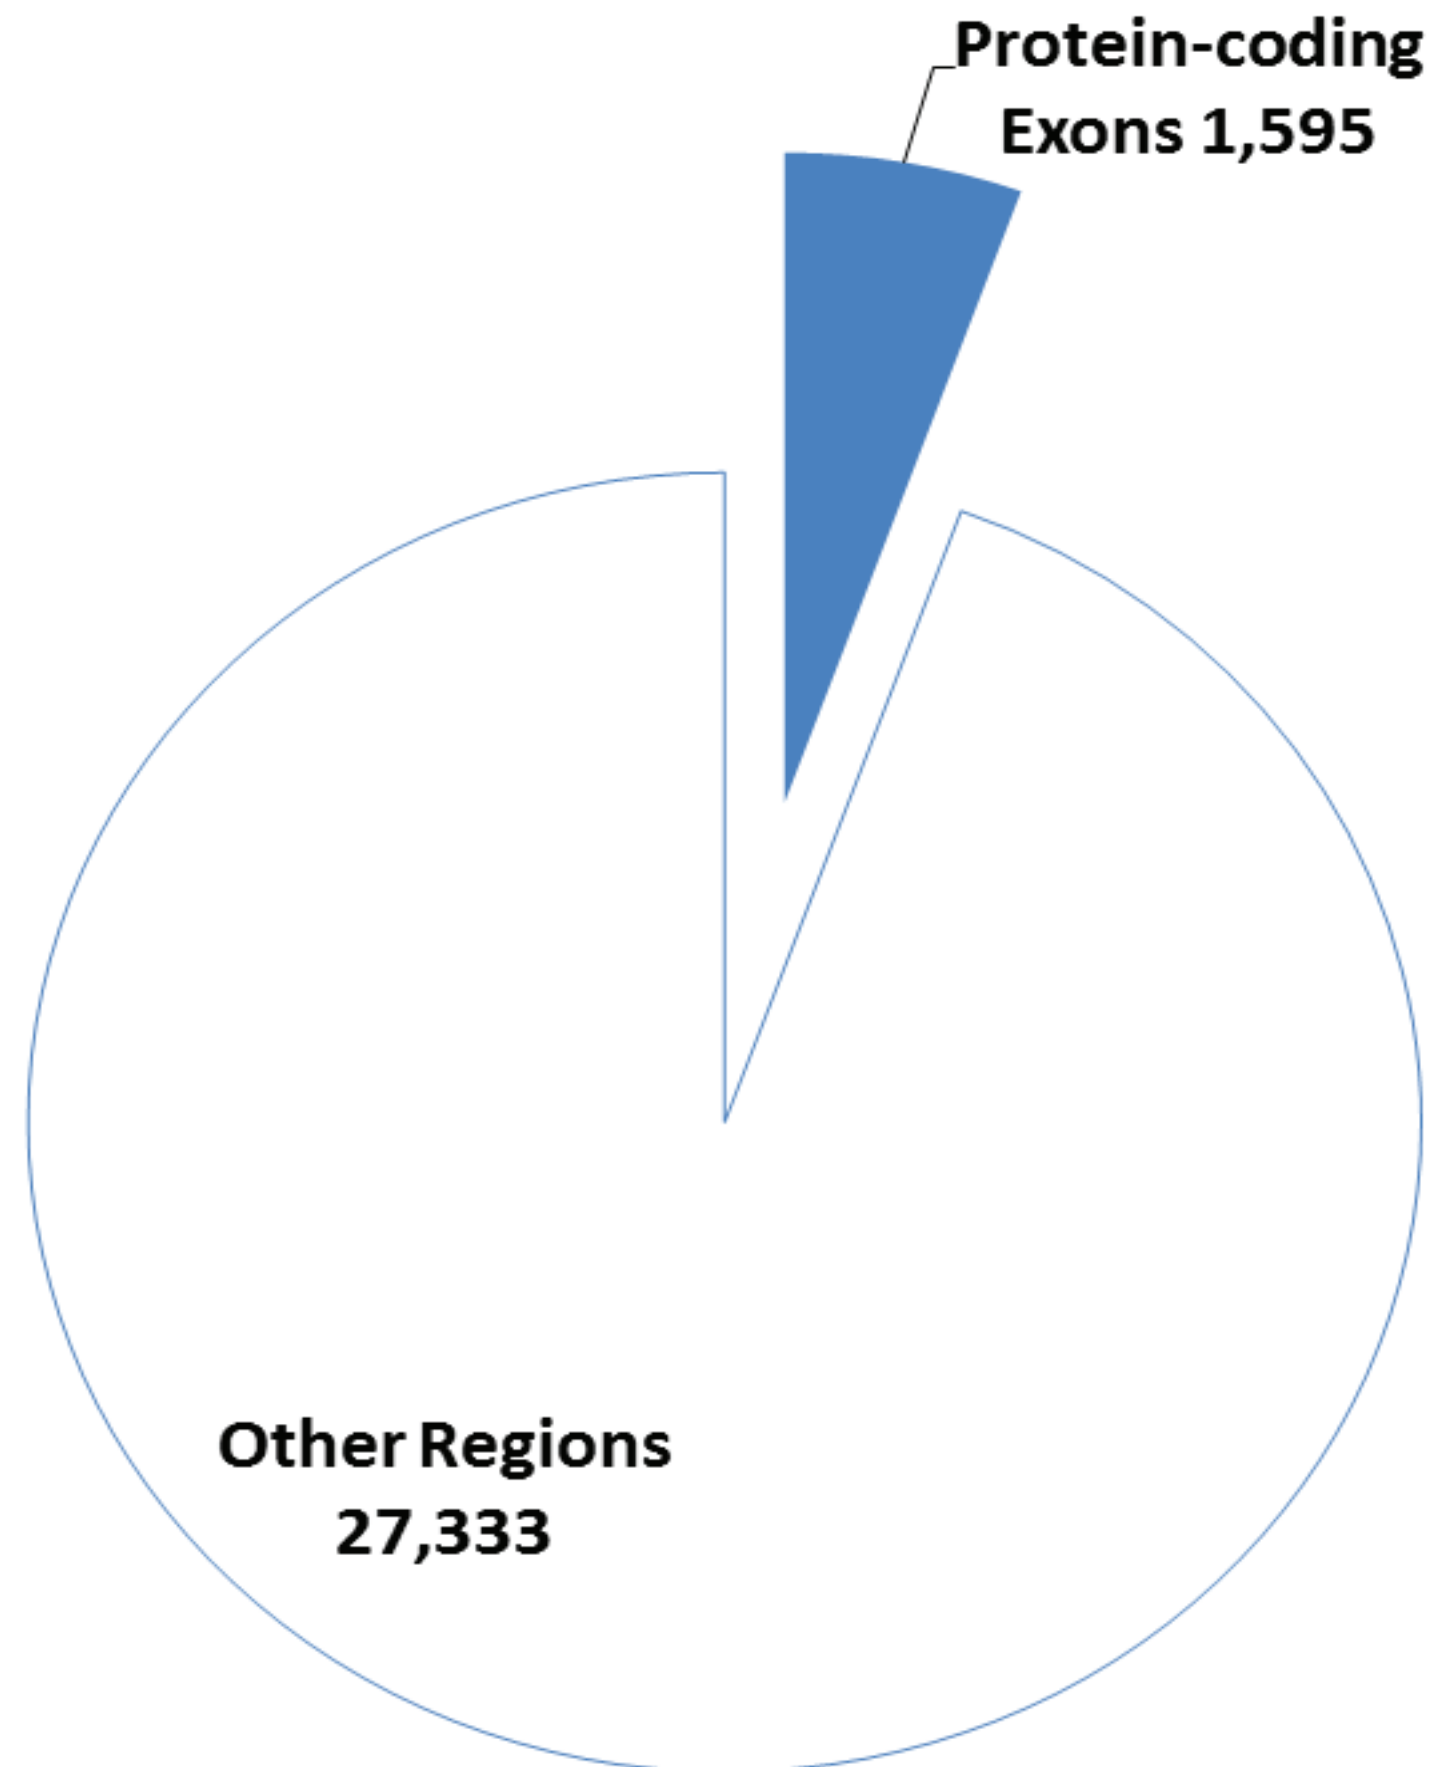

b)

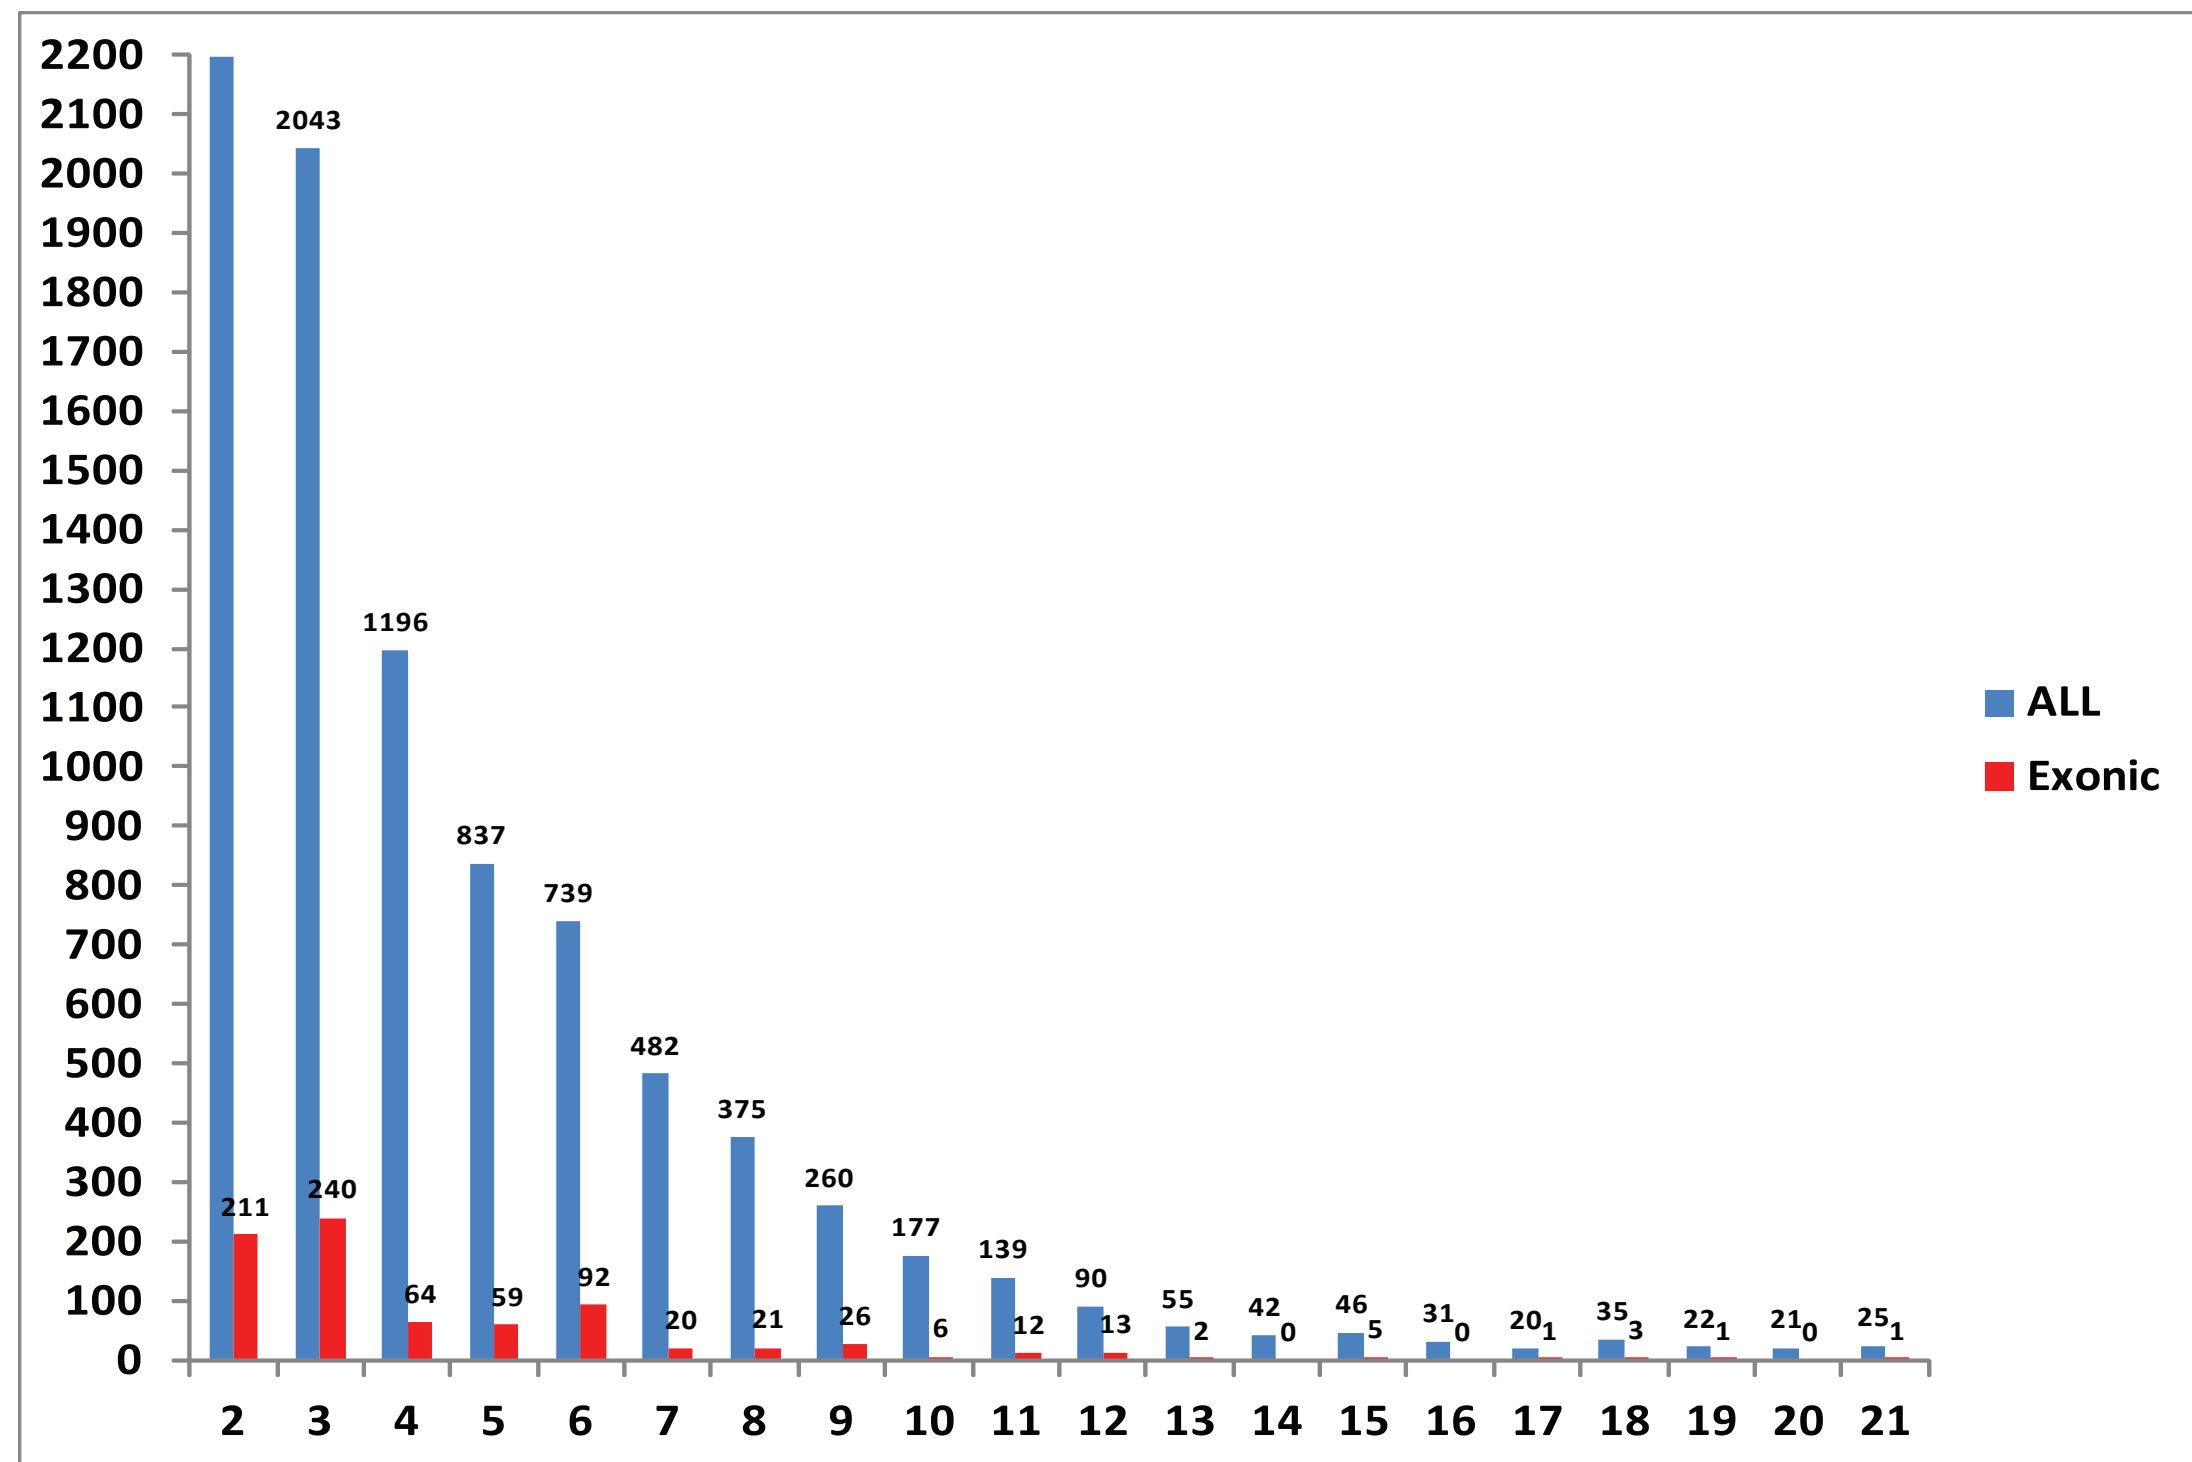

Supplement: 1471-2164-15-255-S8.pdf [file 1471-2164-15-255-S8.pdf]
