# Supplementary material for: Genome-wide variations in a natural isolate of the nematode Caenorhabditis elegans
Source: PubMed Central journal article supplement (PMC4023591; doi:10.1186/1471-2164-15-255), 2014-04-02

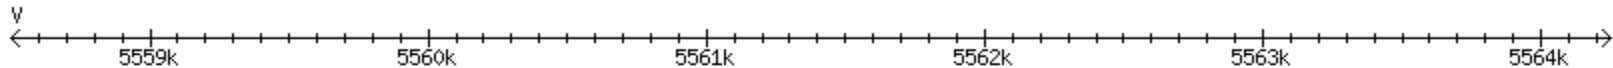

**CG**

C18C4.1b

C18C4.1a

**Unique Reads**

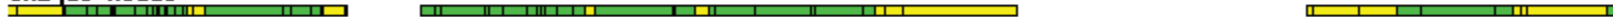

**Non-unique Reads**

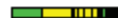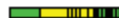

Supplement: 1471-2164-15-255-S22.pdf [file 1471-2164-15-255-S22.pdf]
