# Supplementary material for: Genome-wide variations in a natural isolate of the nematode Caenorhabditis elegans
Source: PubMed Central journal article supplement (PMC4023591; doi:10.1186/1471-2164-15-255), 2014-04-02
Supplement: 1471-2164-15-255-S23.pdf [file 1471-2164-15-255-S23.pdf]

**MS210 gene models**

C18E3.7a

C18E3.7c

C18E3.7c

C18E3.7d

C18E3.7d

C18E3.7d

**Hawaiian Unique Illumina Reads 3SAHA2**

3:110:3805:5220:4/3

a c a a a t

3:21:9307:12361:7

a c [redacted] a a t

3:39:17013:15505:V/3

a c [redacted] a a t

**Hawaiian Non-unique Illumina Reads 3SAHA2**

a a a t

a c a a t

a c a a t

a c a a t

a c [redacted] a a t

a c a a t

a c a a t

a c [redacted] a a t

a c [redacted] a a t

a c [redacted] a a t

a c a a t

a c a a t

a c a a t

a c [redacted] a a t

a c [redacted] a a t

a c [redacted] a a t

a c a a t

a c [redacted] a a t

a c a a t

a c a a t

a c a a t

a c [redacted] a a t

a c [redacted] a a t

a c [redacted] a a t

a c a a t

a c [redacted] a a t

a c [redacted] a a t

a c a a t

a c [redacted] a a t

a c a a t

a c [redacted] a a t

a c a a t
