# Supplementary material for: Genome-wide variations in a natural isolate of the nematode Caenorhabditis elegans
Source: PubMed Central journal article supplement (PMC4023591; doi:10.1186/1471-2164-15-255), 2014-04-02

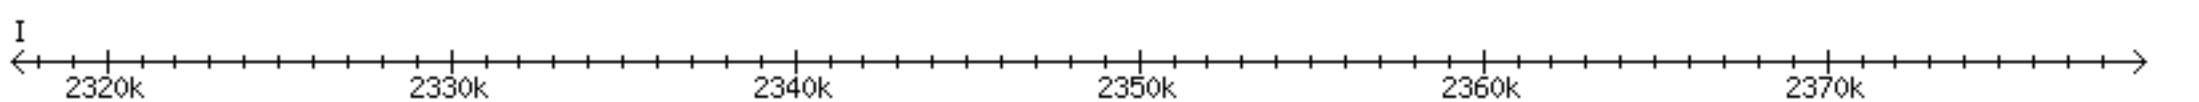

CG

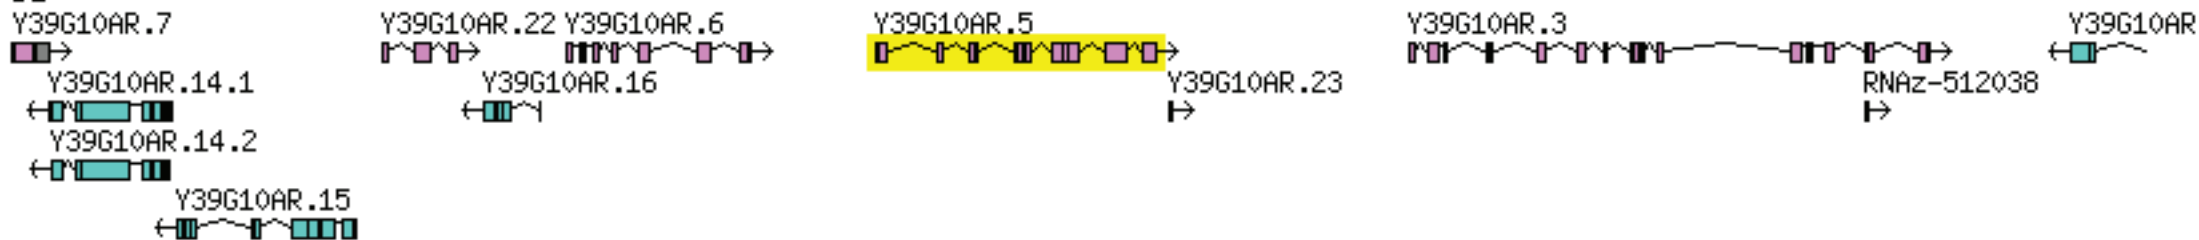

SSAHA2 Gaps (based on unique reads only)

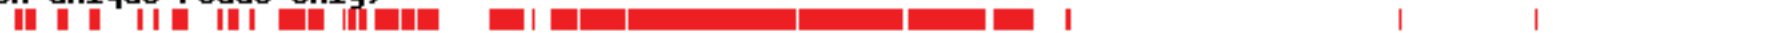

SNVs

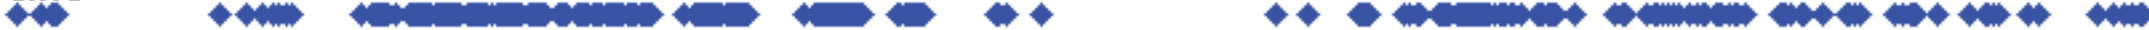

Small Insertions

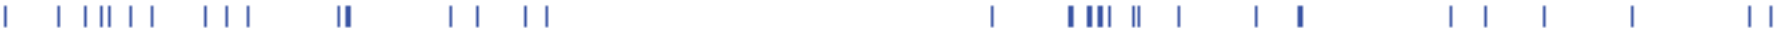

Small Deletions

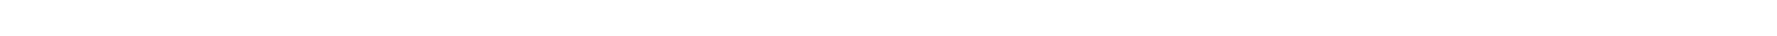

Supplement: 1471-2164-15-255-S24.pdf [file 1471-2164-15-255-S24.pdf]
